# Supplementary material
Source: publisher figshare collection journal article supplement (https://acs.figshare.com/ndownloader/files/3636105)

**Design, synthesis and biological characterization of novel mitochondria targeted dichloroacetate-loaded compounds with antileukemic activity**

Claudio Trapella<sup>†\*</sup>, Rebecca Voltan<sup>†\*</sup>, Elisabetta Melloni<sup>‡</sup>, Veronica Tisato<sup>‡</sup>, Claudio Celeghini<sup>&</sup>, Sara Bianco<sup>†</sup>, Anna Fantinati<sup>†</sup>, Severo Salvadori<sup>†</sup>, Remo Guerrini<sup>†</sup>, Paola Secchiero<sup>‡</sup> and Giorgio Zauli<sup>§</sup>

*Corresponding authors:*

Claudio Trapella: Department of Chemical and Pharmaceutical Sciences and LTTA Centre, University of Ferrara, Via Fossato di Mortara 17, 44121 Ferrara, Italy. Tel: +39-0532-455924; Fax: +39-0532-455953; e-mail: [trap@unife.it](mailto:trap@unife.it).

Giorgio Zauli: Institute for Maternal and Child Health, IRCCS “Burlo Garofolo”, Via dell’Istria 65/1, 34137, Trieste, Italy. Tel: +39-0532-455572; Fax: +39-0532-207351; e-mail: [giorgio.zauli@unife.it](mailto:giorgio.zauli@unife.it).

**Index:**

|                                                                        |         |
|------------------------------------------------------------------------|---------|
| Supplementary Figure 1 and figure legend                               | pg. S3  |
| Supplementary Figure 2 and figure legend                               | pg. S4  |
| Supplementary Figure 3 and figure legend                               | pg. S5  |
| Supplementary Table 1                                                  | pg. S6  |
| Supplementary Experimental Section                                     | pg. S7  |
| General information                                                    | pg. S8  |
| <sup>1</sup> H-NMR compound <b>5</b>                                   | pg. S9  |
| <sup>13</sup> C-NMR, DEPT and <sup>31</sup> P-NMR of compound <b>5</b> | pg. S10 |
| HPLC of compound <b>5</b>                                              | pg. S11 |
| <sup>1</sup> H-NMR compound <b>8</b>                                   | pg. S12 |
| <sup>13</sup> C-NMR and DEPT compound <b>8</b>                         | pg. S13 |
| HPLC and purity grade of compound <b>8</b>                             | pg. S14 |
| HRMS compound <b>9</b>                                                 | pg. S15 |
| <sup>1</sup> H-NMR compound <b>9</b>                                   | pg. S16 |
| <sup>13</sup> C-NMR and DEPT and <sup>31</sup> P-NMR compound <b>9</b> | pg. S17 |
| HPLC and purity grade of compound <b>9</b>                             | pg. S18 |
| HRMS compound <b>10</b>                                                | pg. S19 |
| <sup>1</sup> H-NMR compound <b>10</b>                                  | pg. S20 |
| <sup>13</sup> C-NMR compound <b>10</b>                                 | pg. S21 |
| HPLC and purity grade of compound <b>10</b>                            | pg. S22 |
| HRMS compound <b>11</b>                                                | pg. S23 |
| <sup>1</sup> H-NMR compound <b>11</b>                                  | pg. S24 |
| <sup>13</sup> C-NMR, DEPT and HPLC of compound <b>11</b>               | pg. S25 |
| Purity grade of compound <b>11</b>                                     | pg. S26 |
| LC/MS Spectra mouse plasma at 2.5h                                     | pg. S27 |
| LC/MS Spectra mouse plasma at 4.0h                                     | pg. S28 |
| LC/MS Spectra mouse plasma at 7.0h                                     | pg. S29 |

### Supplementary Figure 1

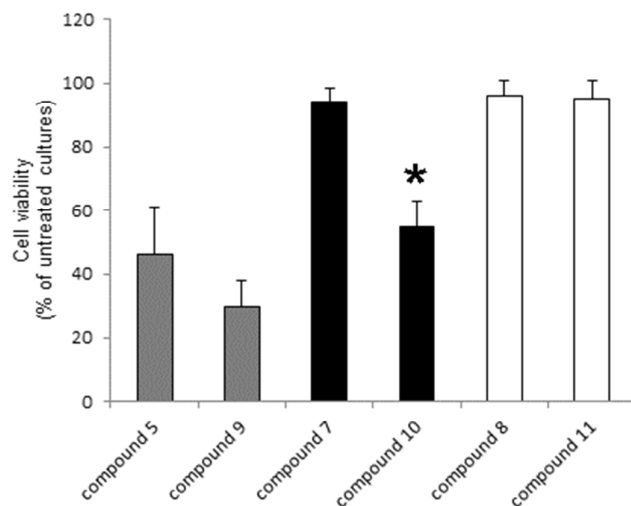

**Evaluation of cytotoxic effects on cell viability of DCA-loaded compounds and corresponding backbone carriers.** Leukemic cell cultures were exposed to compounds **9**, **10** and **11** and to the corresponding backbone carriers (compounds **5**, **7** and **8**) (all used at the concentration of 300  $\mu$ M) and cell viability was assessed at 48 hours of treatment. The analysis of cell viability in response to each DCA-loaded compounds is shown in comparison with respect to the corresponding carrier (bars with same colors); the asterisk indicates  $p < 0.05$ .

## Supplementary Figure 2

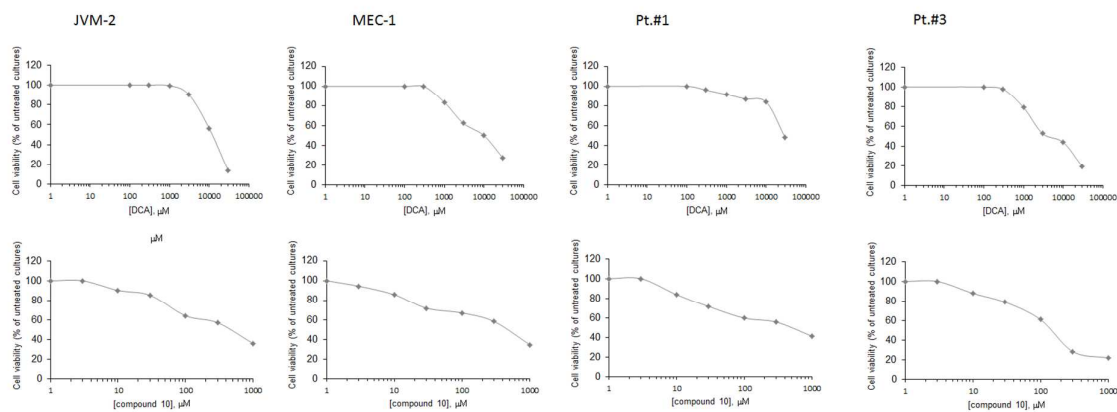

**Determination of IC<sub>50</sub> for DCA and compound 10.** Representative dose-response curves for the determination of IC<sub>50</sub> values of the anti-leukemic activity exhibited either by DCA (upper graphs) and by compound 10 (lower graphs), assessed in leukemic cell lines and primary B-CLL patient derived cells. As shown by the graphs in log scale, compound 10 was able to exhibit the anti-leukemic effect of DCA at significantly lower concentrations (as reported also in **Table 1**).

### Supplementary Figure 3

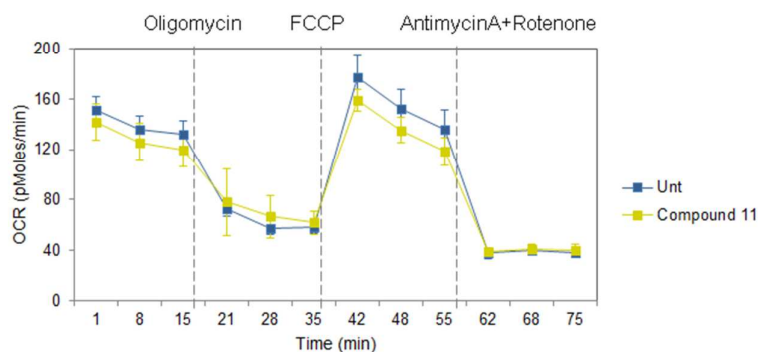

**Characterization of the effects of the DCA-loaded compound 11 on cellular bioenergetics functions.** Leukemic cells were left untreated or treated for 3h with 300  $\mu$ M of compound **11** and run on the Seahorse analyzer. Oxygen consumption rate (OCR) measurements were recorded after the sequential addition of oligomycin, FCCP (Carbonyl cyanide-ptrifluoromethoxyphenylhydrazine) and the combination of antimycin A and rotenone. OCR traces are expressed as pMoles  $O_2$  per minute and normalized to cell number. Each data point represents mean $\pm$ SD of six independent experiments.

**Supplementary table 1.** IC<sub>50</sub> values for DCA and compound **10** in tumor cell lines of epithelial origin

| <i>Cells</i> | <i>IC<sub>50</sub> (mM)</i> |                    |
|--------------|-----------------------------|--------------------|
|              | <i>DCA</i>                  | <i>compound 10</i> |
| HCT116       | 20.00±1.88                  | 0.33±0.02          |
| Hep3B        | 18.61±1.67                  | 0.45±0.04          |
| MCF7         | 16.84±1.12                  | 0.35±0.03          |
| MCF10A       | 16.11±1.49                  | 0.48±0.03          |

Values are mean±SD calculated after 48 hours of culture treatment of experiments carried out at least in triplicate for each cell culture.

## Supplementary Experimental Section

The epithelial-derived cell lines HCT116, Hep3B, MCF7 and MCF10A were purchased from ATCC (American Type Culture Collection, Manassas, VA, USA). The p53<sup>wild-type</sup> HCT116 human colon cancer cells were cultured in Dulbecco's modified Eagle's medium (DMEM) containing 10% FBS, L-glutamine and Penicillin/streptomycin (all from Gibco). The Hep3B cells and the MCF7 cells were cultured in DMEM and RPMI-1640 media respectively, all supplemented with 10% FBS, L-glutamine and Penicillin/streptomycin. MCF10A cells were maintained in DMEM/F12 medium supplemented with 10% FBS, L-glutamine and Penicillin/streptomycin, EGF (20 ng/mL), Hydrocortisone (0.5 µg/mL), Insulin (10 µg/mL) (all from Gibco). Cells were cultured in a 6-well flat-bottomed multi-well tissue culture plates under normal conditions (ambient air; 5% CO<sub>2</sub>) and grown to subconfluence before treatments with DCA (Sigma-Aldrich, St Louis, MO; used in the range of 1-30 mM) and DCA-loaded compounds and carries (used in the range of 3-300 µM).

## General Information

All the NMR spectra were elaborated using Mestre Nova 6.0.2 software and FID data are available on request. Analytical thin layer chromatography (TLC) was performed on silica gel Macherey-Nagel poligram SIL/UV 254 of 0.25 mm, visualization was achieved using UV light (254) and potassium permanganate (KMnO<sub>4</sub>) 2% in water. Flash column chromatography was undertaken on silica gel Merck 60-200 mesh using Isolera Biotage (Sweden). Products were dried using sodium sulfate anhydrous (Carlo Erba). Proton nuclear magnetic resonance (<sup>1</sup>H-NMR) and carbon nuclear magnetic resonance (<sup>13</sup>C-NMR) were recorded using VARIAN 400 MHz. All the spectra were recorded using as solvent CDCl<sub>3</sub> otherwise the solvent was specified. Chemical shifts (δ) were quoted in ppm relative to residual solvent and coupling constants (J) were quoted in Hertz (Hz). Multiplicity was reported with the following abbreviations: s = singlet; d = doublet; t = triplet; q = quartet; m = multiplet, bs = broad signal. Molecular weights were measured with a mass spectrometer ESI MICROMASS ZMD 2000 (Waters, UK) and high resolution spectra with an Agilent ESI-Q-TOF LC/MS 6520 System (Agilent Technologies, USA). Solvents and chemicals used for TLC, chromatographic purification, crystallizations and reactions were reported with the following abbreviations: Et<sub>2</sub>O for diethyl ether, THF for tetrahydrofuran, AcOEt for ethyl acetate, DCM for methylene chloride, CH<sub>3</sub>CN for acetonitrile, TFA for trifluoro acetic acid. Analytical HPLC were recorded with Beckmann system Gold HPLC using a linear gradient from 0% to 100% solvent B (60% acetonitrile/40% water/0.1% TFA) using a Kinetex C<sub>18</sub> Coloumn (250mmX mm, 5μm).



# Synthesis of (6-((1,3-diacetoxy-2-(acetoxymethyl)propan-2-yl)amino)-6-oxohexyl)triphenylphosphonium bromide (5)

<sup>1</sup>H-NMR compound **5**:

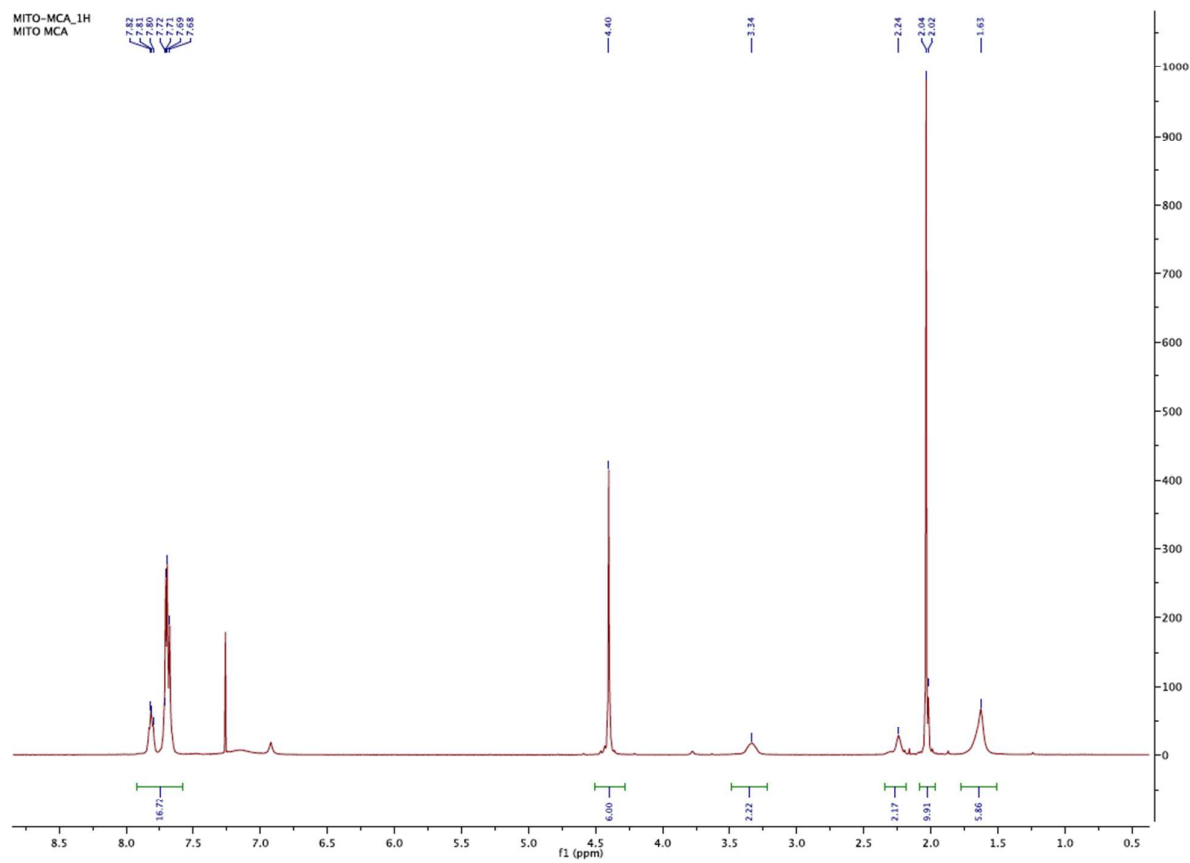

$^{13}\text{C}$ -NMR and DEPT compound **5**:

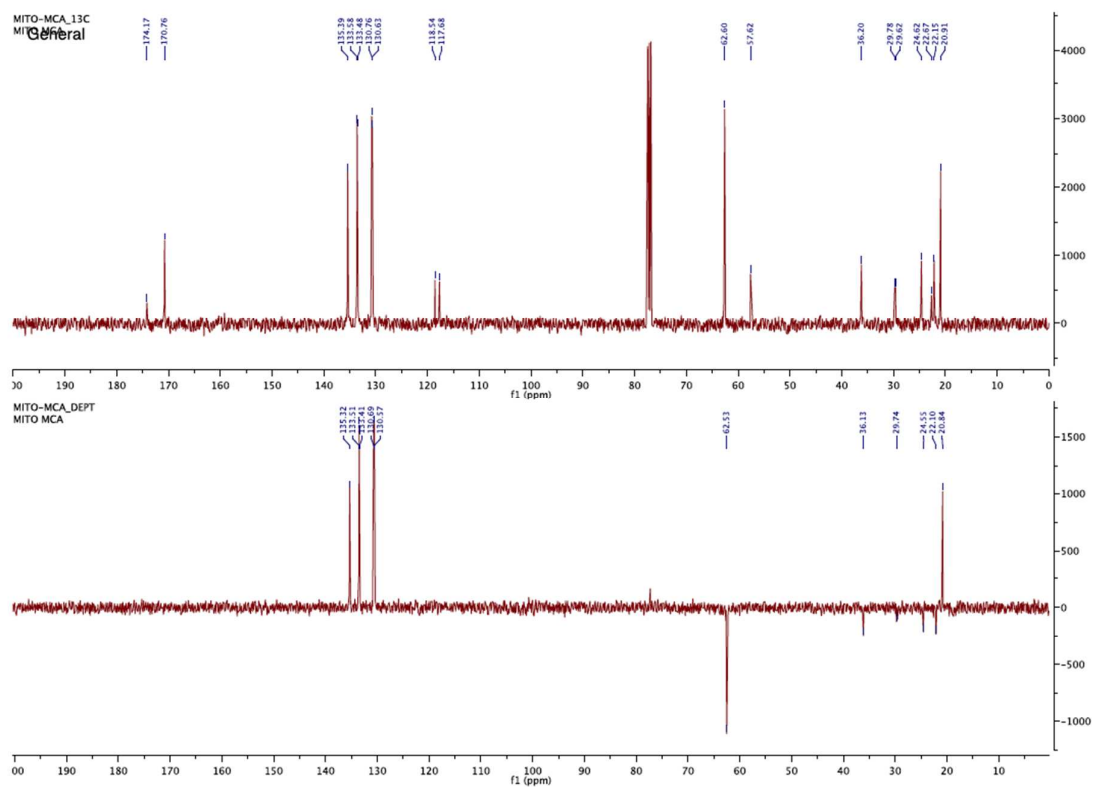

$^{31}\text{P}$ -NMR of compound **5**

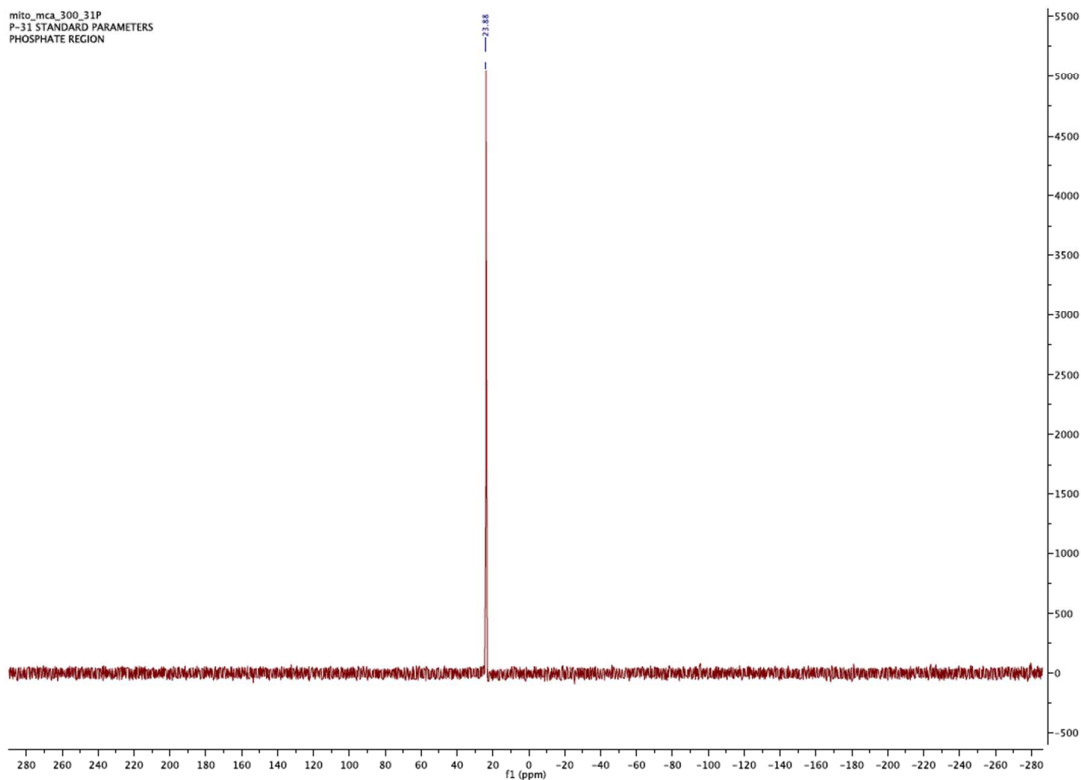

Purity grade by HPLC of compound **5**:

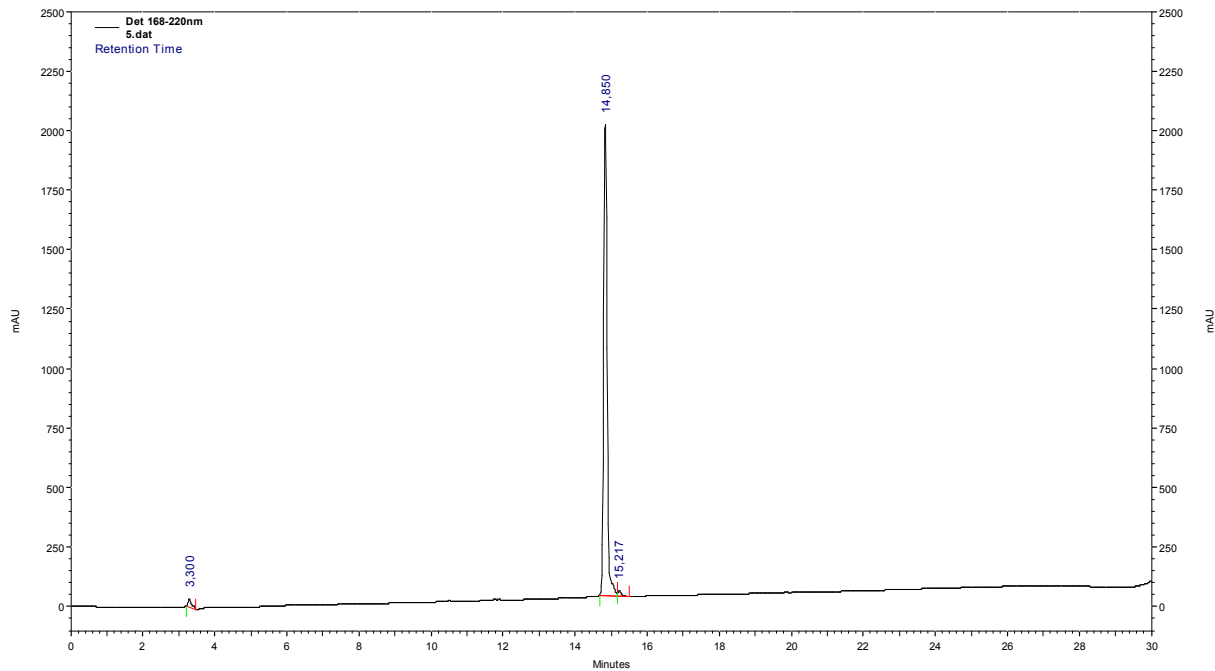

**Det 168-220nm**  
**Results**

| Time   | Area     | Area % | Height  | Height % |
|--------|----------|--------|---------|----------|
| 3,300  | 260722   | 1,83   | 35642   | 1,75     |
| 14,850 | 13877492 | 97,27  | 1980168 | 97,27    |
| 15,217 | 129154   | 0,91   | 19969   | 0,98     |
| Totals | 14267368 | 100,00 | 2035779 | 100,00   |

**Synthesis of 2-((tert-butoxycarbonyl)amino)-N,N-bis((2-((tert-butoxycarbonyl)amino)ethyl)-N-methylthalaminium iodide (8)**

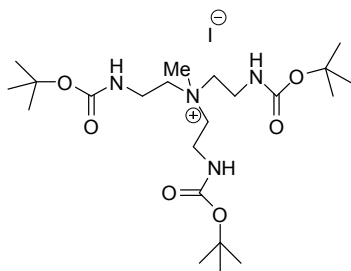

$^1\text{H}$ -NMR compound **8**:

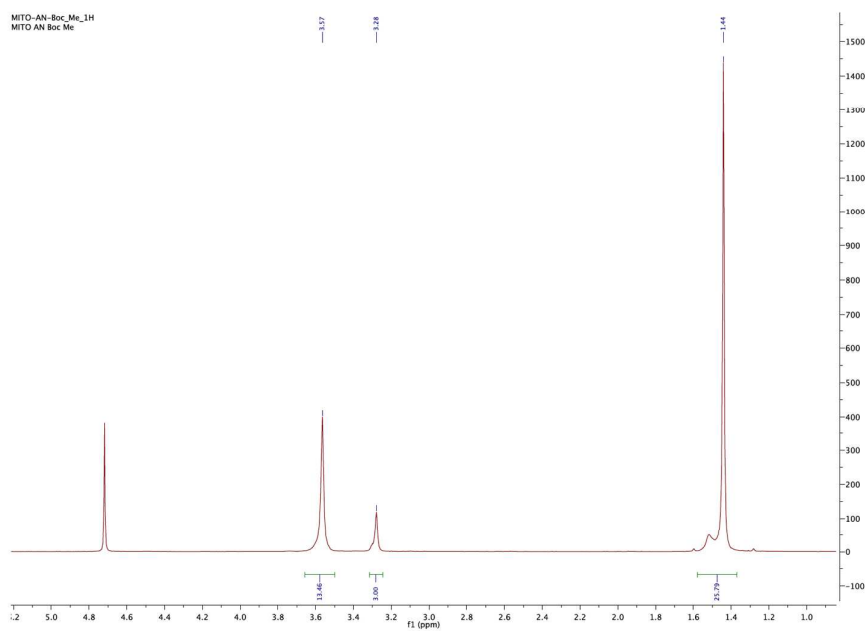

<sup>13</sup>C-NMR and DEPT compound **8**:

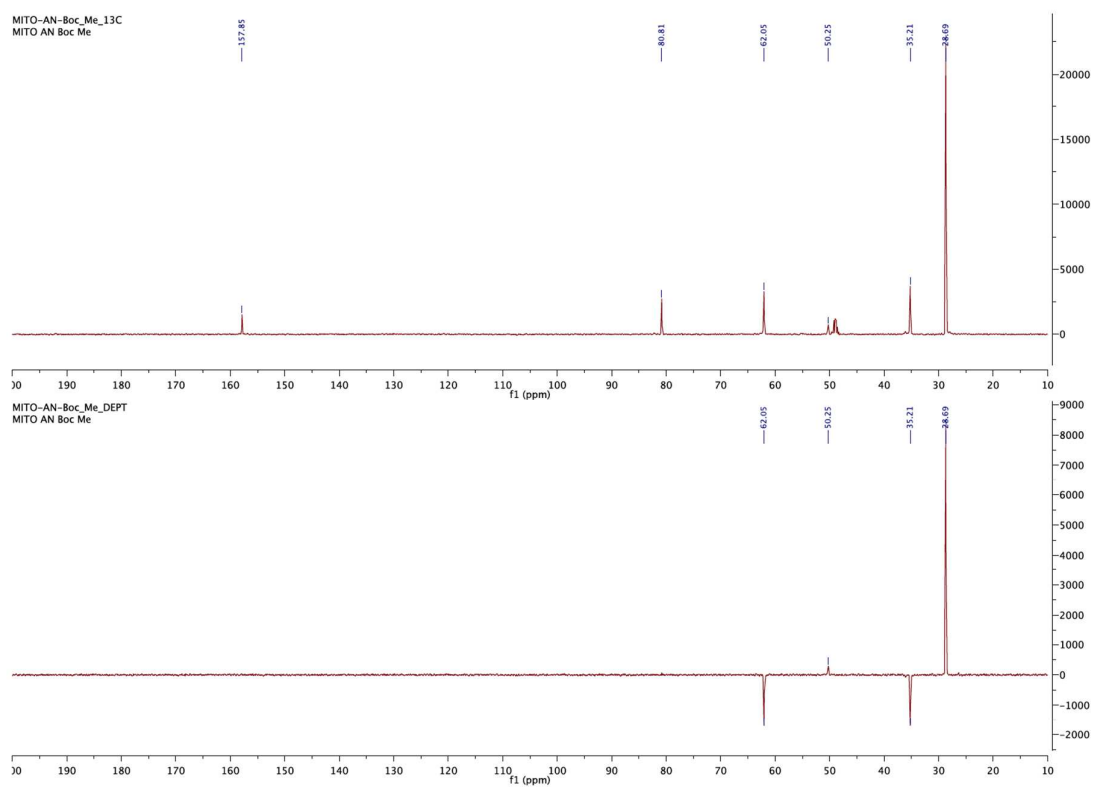

Purity grade by HPLC of compound **8**:

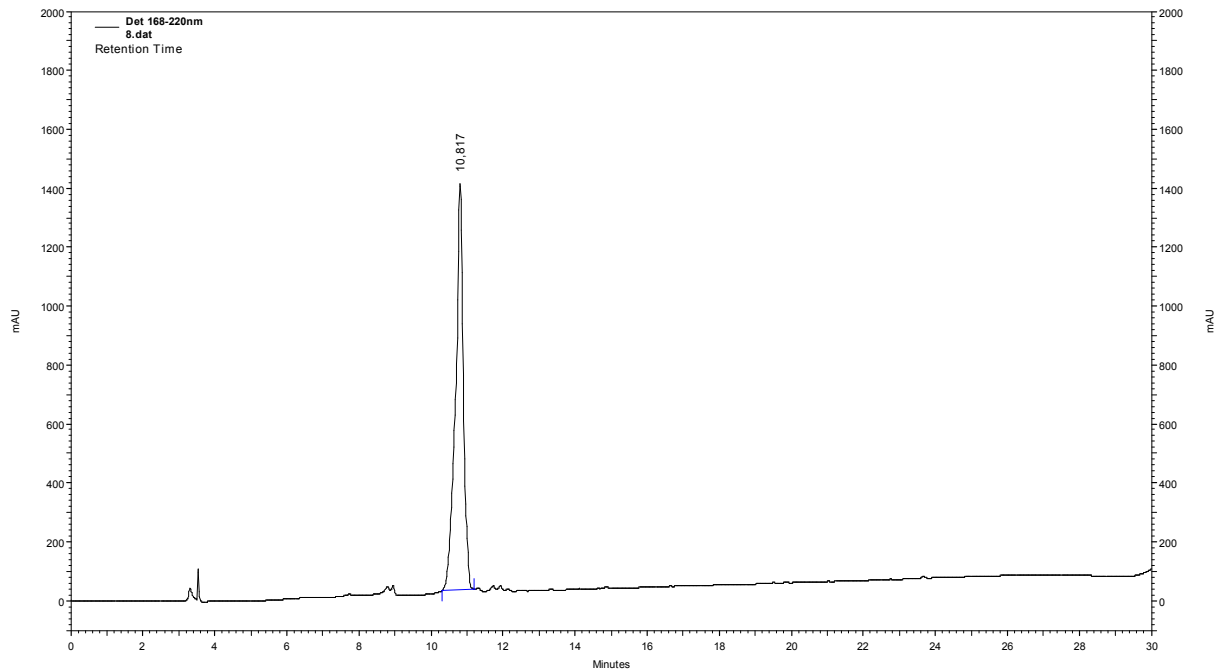

**Det 168-220nm**

**Results**

| Time   | Area     | Area % | Height  | Height % |
|--------|----------|--------|---------|----------|
| 10,817 | 21154899 | 100,00 | 1377744 | 100,00   |

|        |          |        |         |        |
|--------|----------|--------|---------|--------|
| Totals | 21154899 | 100,00 | 1377744 | 100,00 |
|--------|----------|--------|---------|--------|

**Synthesis of (6-((1,3-bis(2,2-dichloroacetoxy)-2-((2,dichloroacetoxy)methyl)propan-2-yl)amino)-6-oxohexyl)triphenylphosphonium (9)**

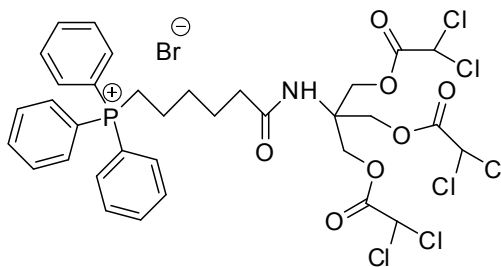

HRMS (ESI) of compound **9**:  $[M+H]^+ = 812.028640$

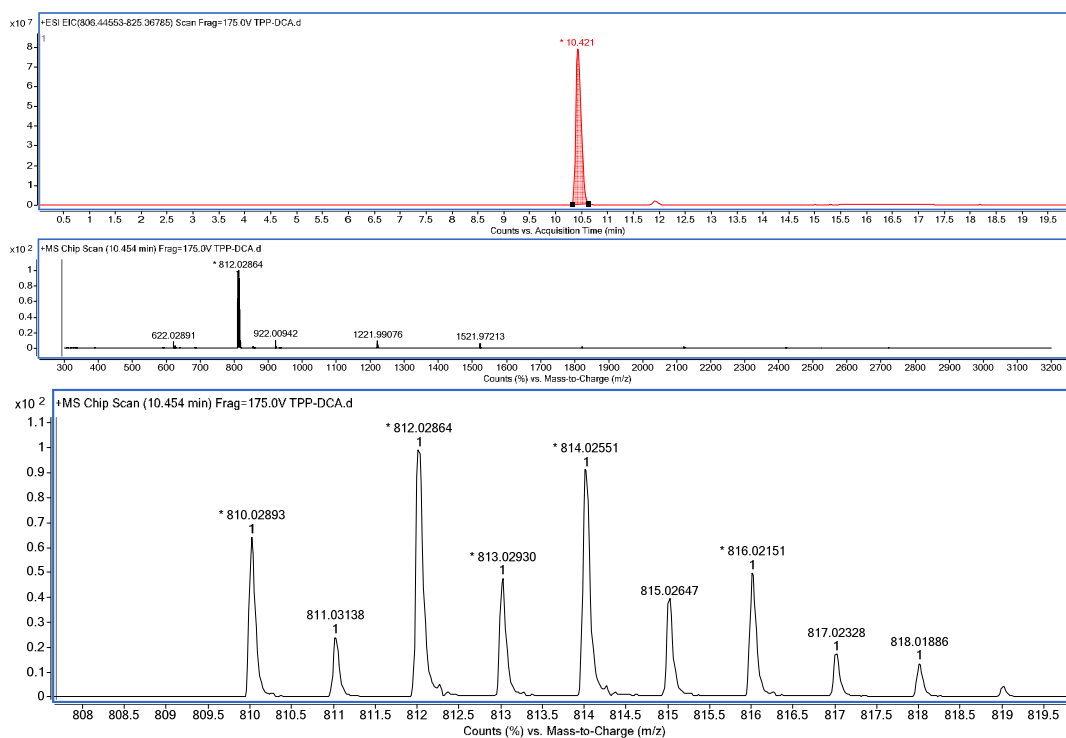

|  | Calc. Mass | Mis. Mass  | Error ppm |
|--|------------|------------|-----------|
|  | 812.0257   | 812.028640 | 3.620575  |

$^1\text{H}$ -NMR compound **9**:

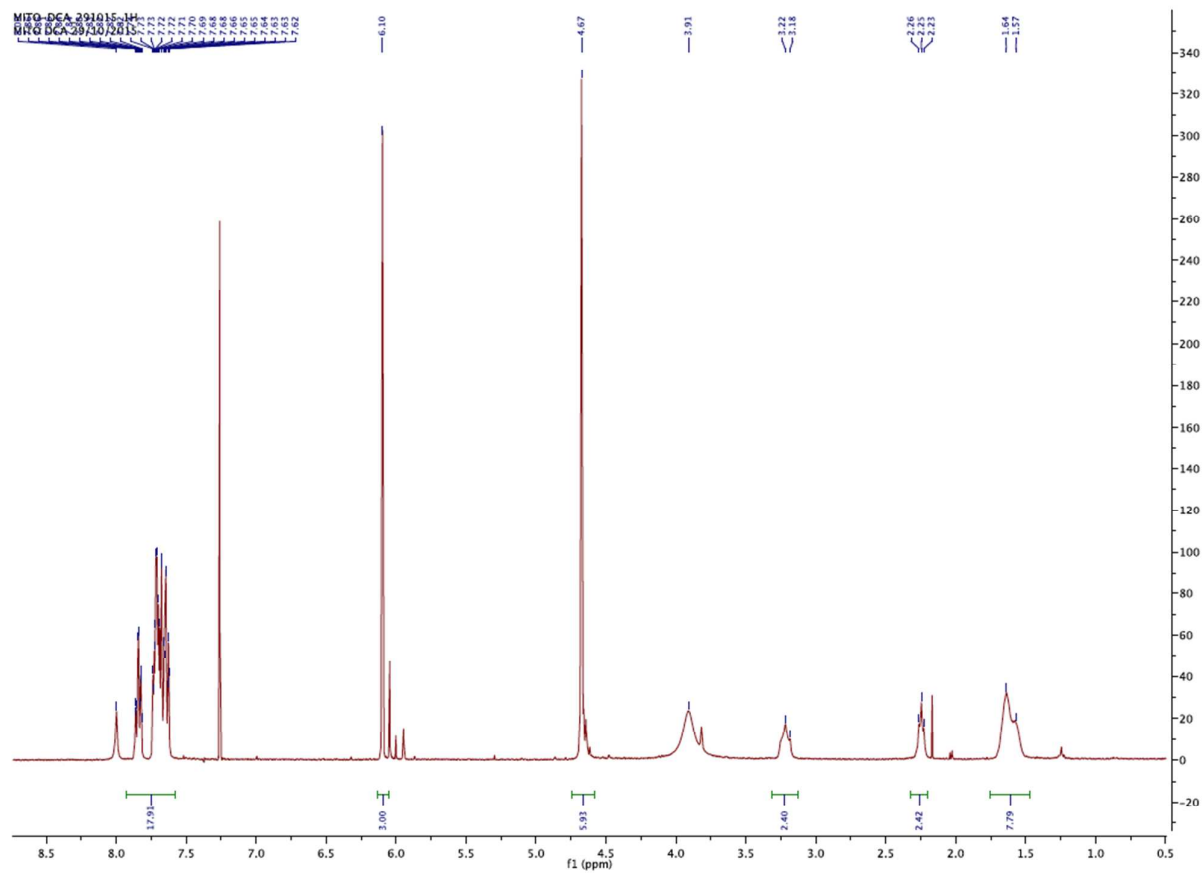



<sup>13</sup>C-NMR and DEPT compound 9:

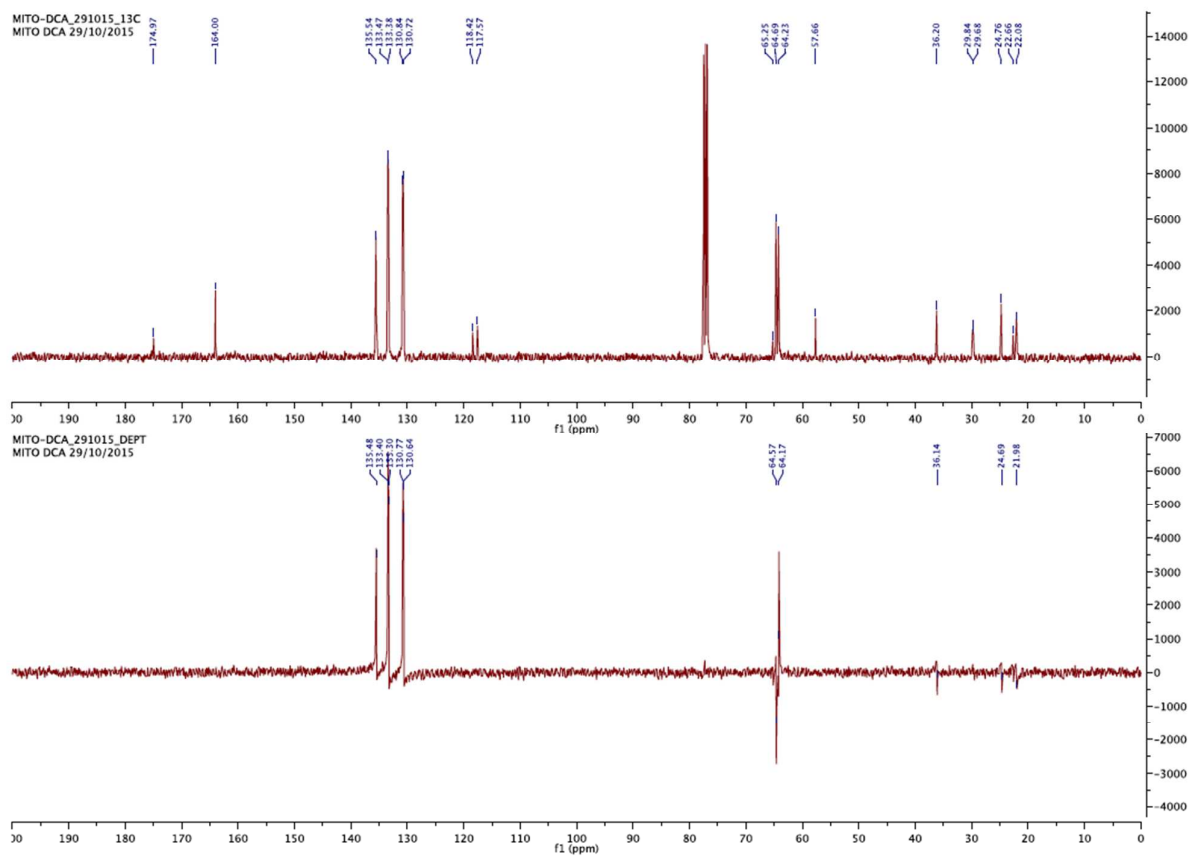

<sup>31</sup>P-NMR of compound 9

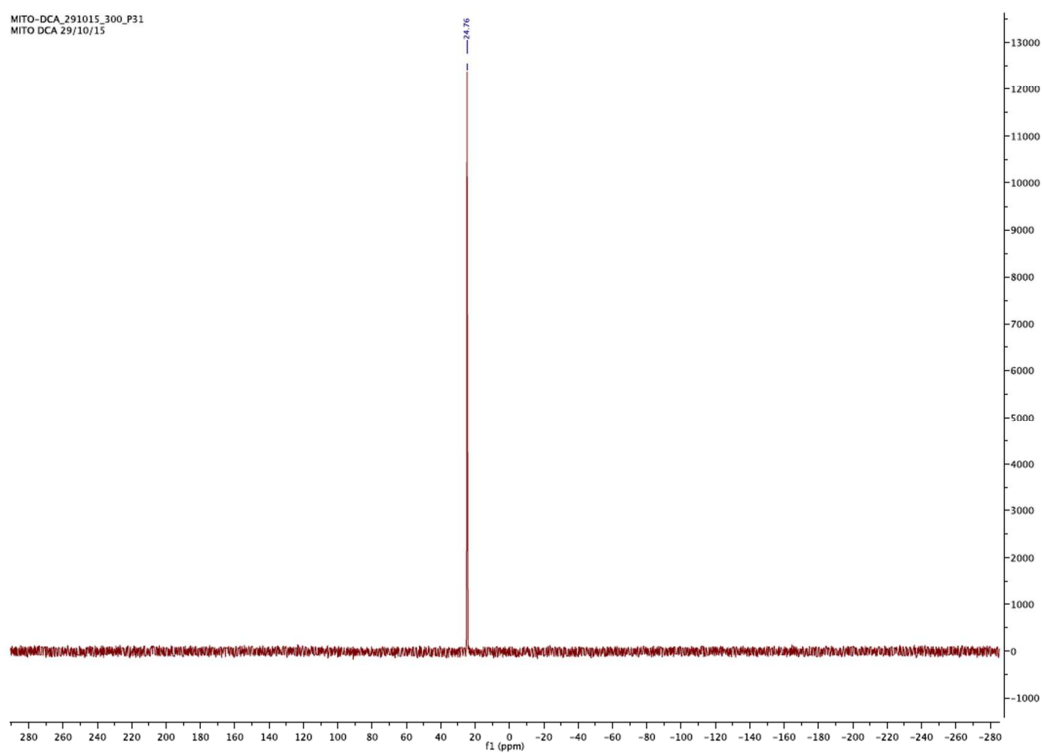

Purity grade by HPLC of compound **9**:

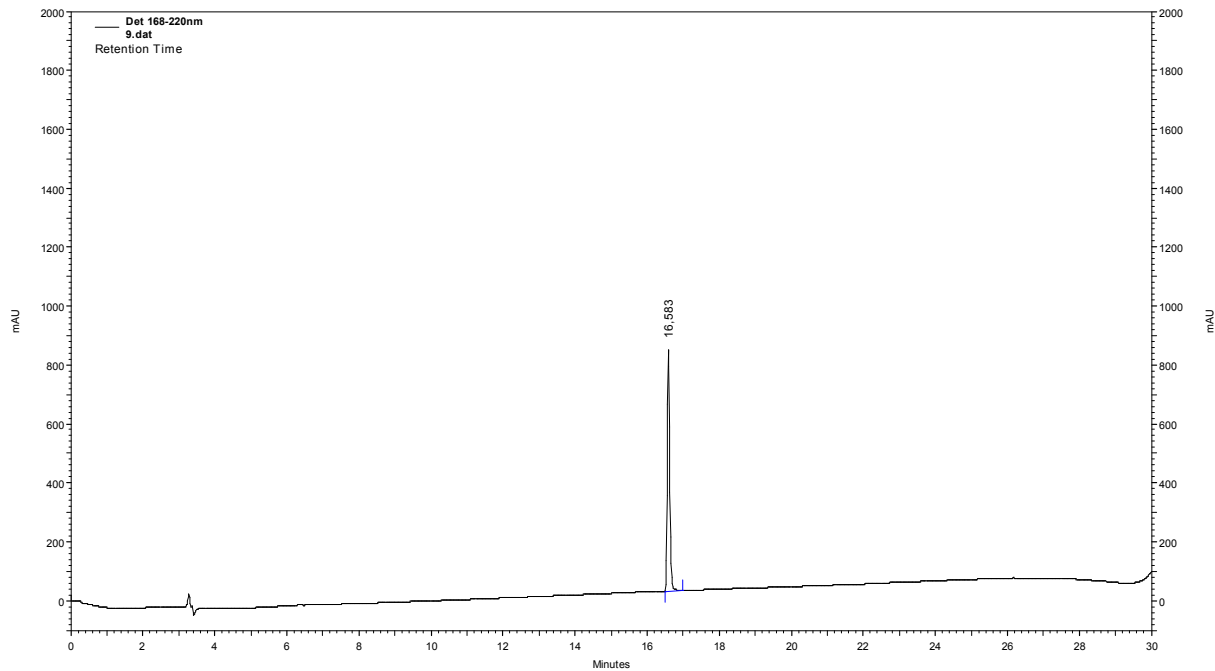

**Det 168-220nm**

**Results**

| Time   | Area    | Area % | Height | Height % |
|--------|---------|--------|--------|----------|
| 16,583 | 3959035 | 100,00 | 819455 | 100,00   |

|        |         |        |        |        |
|--------|---------|--------|--------|--------|
| Totals | 3959035 | 100,00 | 819455 | 100,00 |
|--------|---------|--------|--------|--------|

# Synthesis of N,N',N''-(nitrilotris(ethane-2,1-diyl))tris(2,2-dichloroacetamide) (**10**)

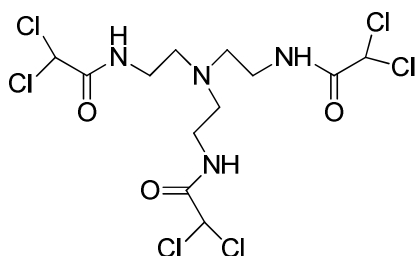

HRMS (ESI) of compound **10**:  $[M+H]^+ = 476.95839$

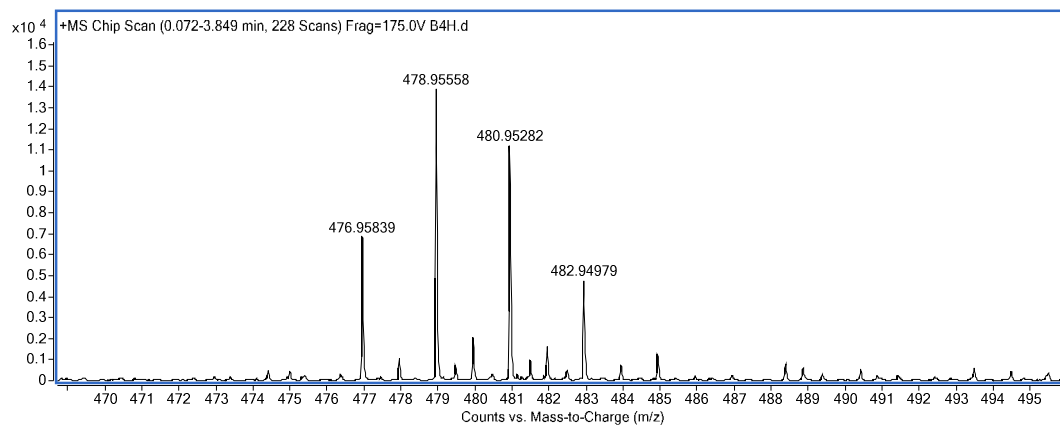

| Calc. Mass | Mis. Mass | Error ppm |
|------------|-----------|-----------|
| 476.958283 | 476.95839 | 0.224338  |

<sup>1</sup>H-NMR compound **10**:

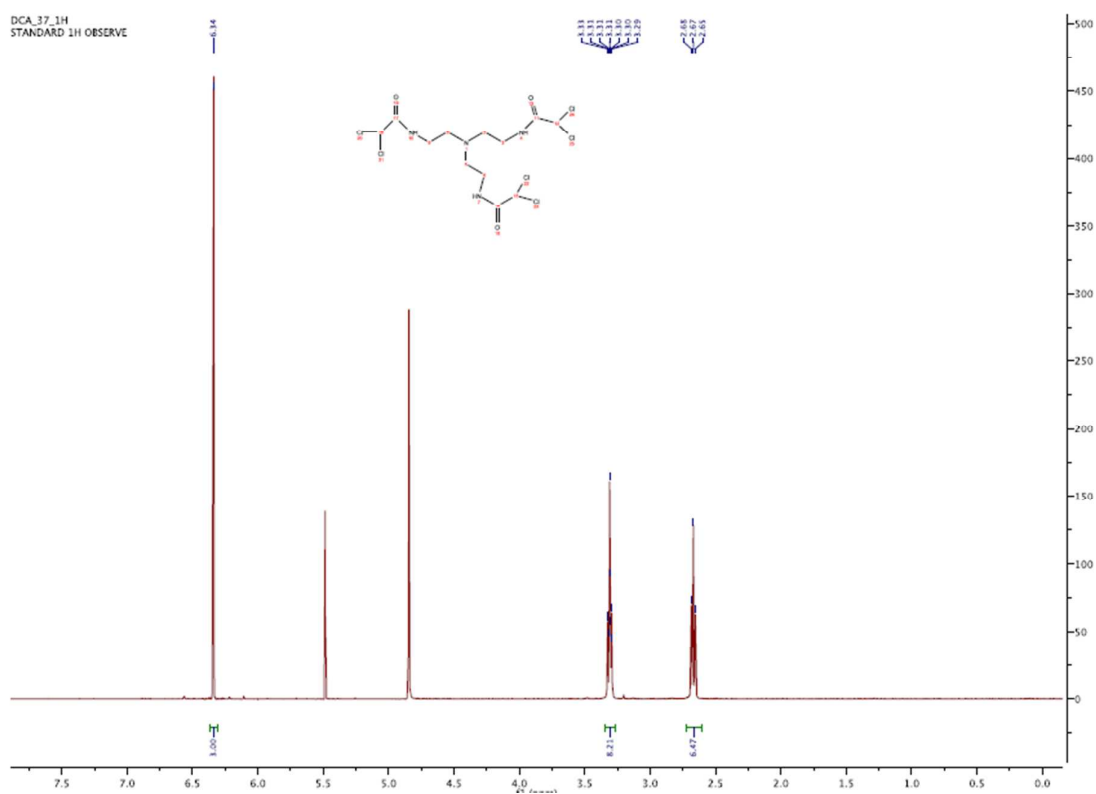

$^{13}\text{C}$ -NMR compound **10**:

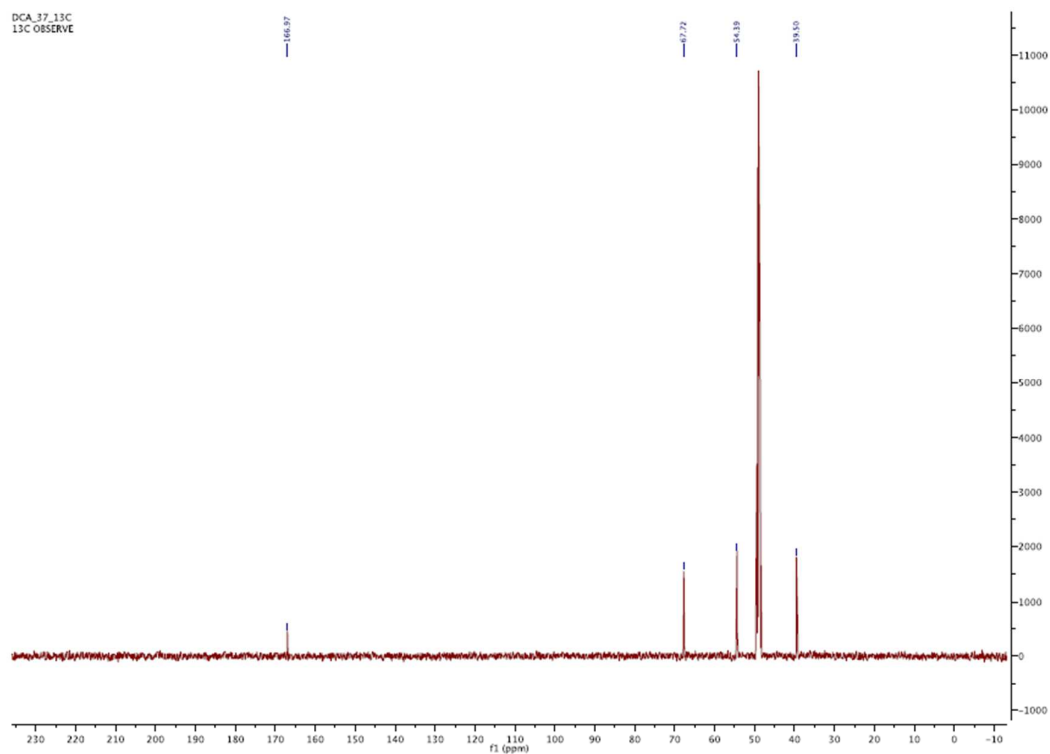

Purity grade by HPLC of compound **10**:

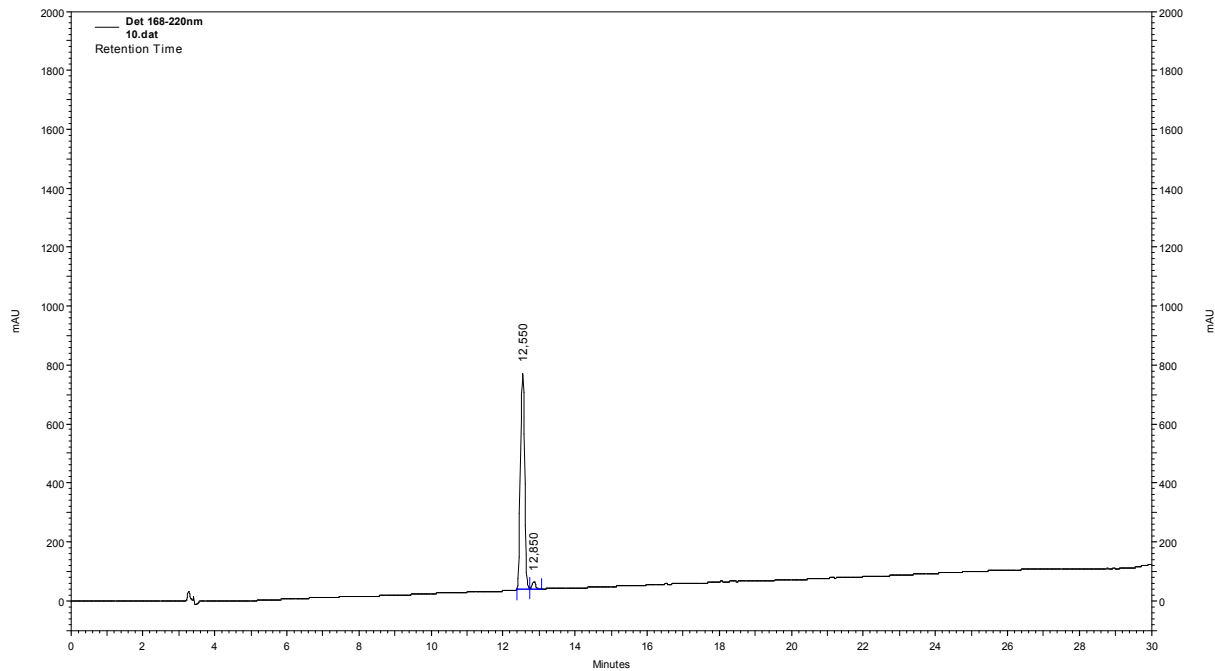

**Det 168-220nm**

**Results**

| Time   | Area    | Area % | Height | Height % |
|--------|---------|--------|--------|----------|
| 12,550 | 5561952 | 96,64  | 731875 | 96,57    |
| 12,850 | 193209  | 3,36   | 26007  | 3,43     |

|        |         |        |        |        |
|--------|---------|--------|--------|--------|
| Totals | 5755161 | 100,00 | 757882 | 100,00 |
|--------|---------|--------|--------|--------|

# Synthesis of 2-(2,2-dichloroacetamido)-N,N-bis(2-(2,2-dichloroacetamido)ethyl)-N-methylethanaminium trifluoroacetate (**11**)

HRMS (ESI) of compound **11**:  $[M+H]^+ = 490.974115$

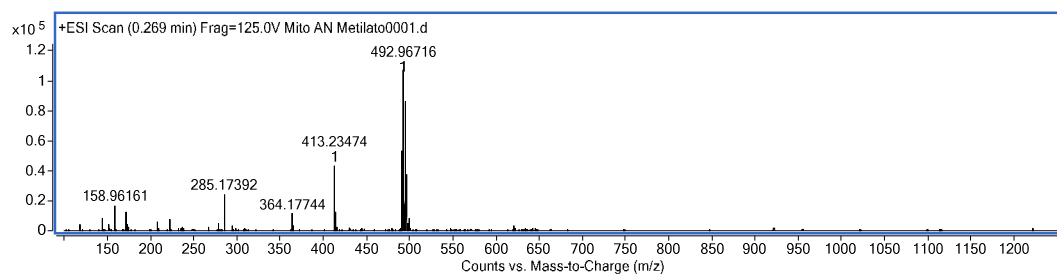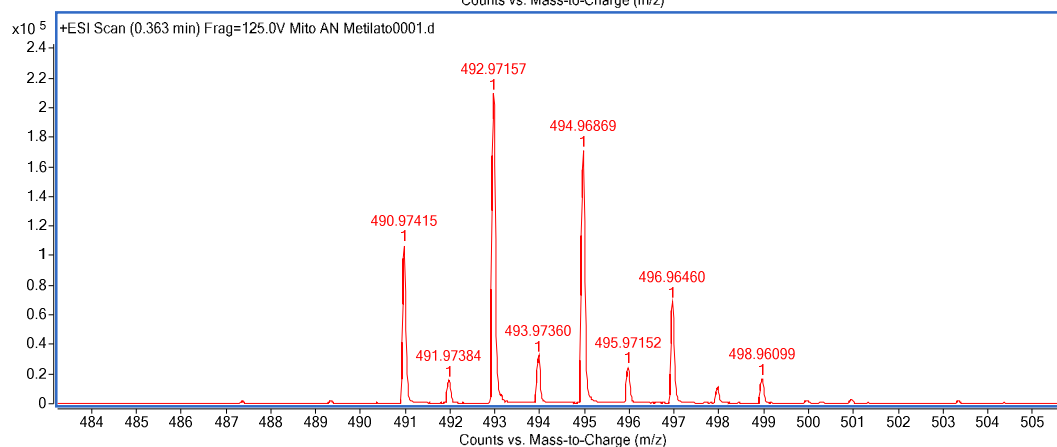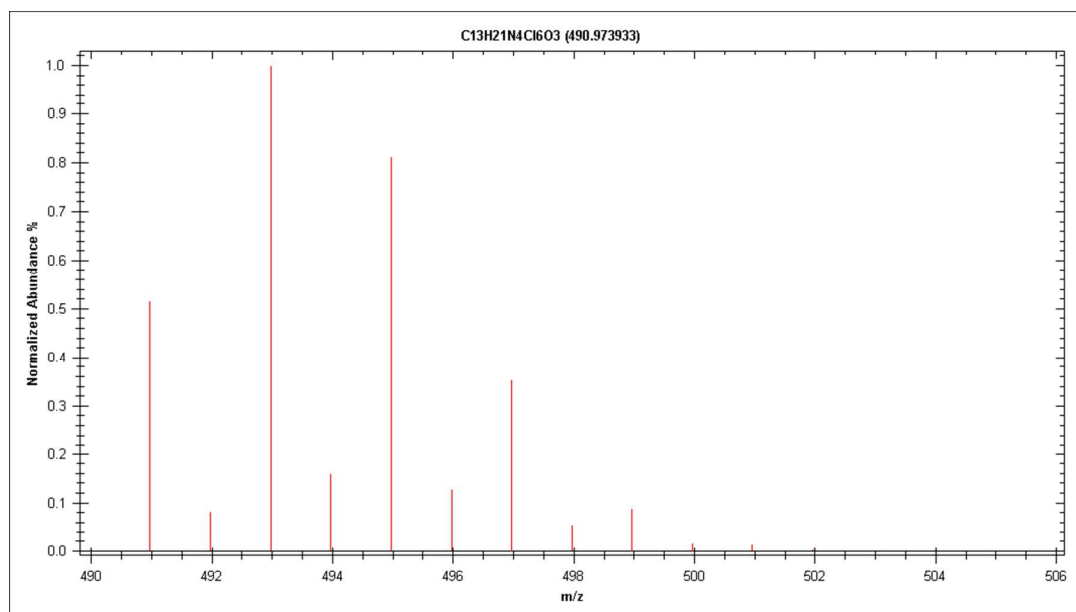

| Calc. Mass | Mis. Mass  | Error ppm |
|------------|------------|-----------|
| 490.973933 | 490.974115 | 0.370692  |

MITO-AN-DCA\_lifilizzato\_1H

MITO-AN-DCA\_lifilizzato

Chemical structure of MITO-AN-DCA is shown in the top left corner.

<sup>1</sup>H NMR spectrum (ppm) showing peaks at 6.34, 4.88, 3.28, 3.61, 3.79, 3.78, 3.63, 3.61, 3.59, and 3.58 ppm. The x-axis ranges from 7.4 to 1.8 ppm. The y-axis ranges from -200 to 2800.

Integration values are provided for the peaks: 2.61, 6.01, 6.00, and 2.89.



$^{13}\text{C}$ -NMR and DEPT compound **11**:

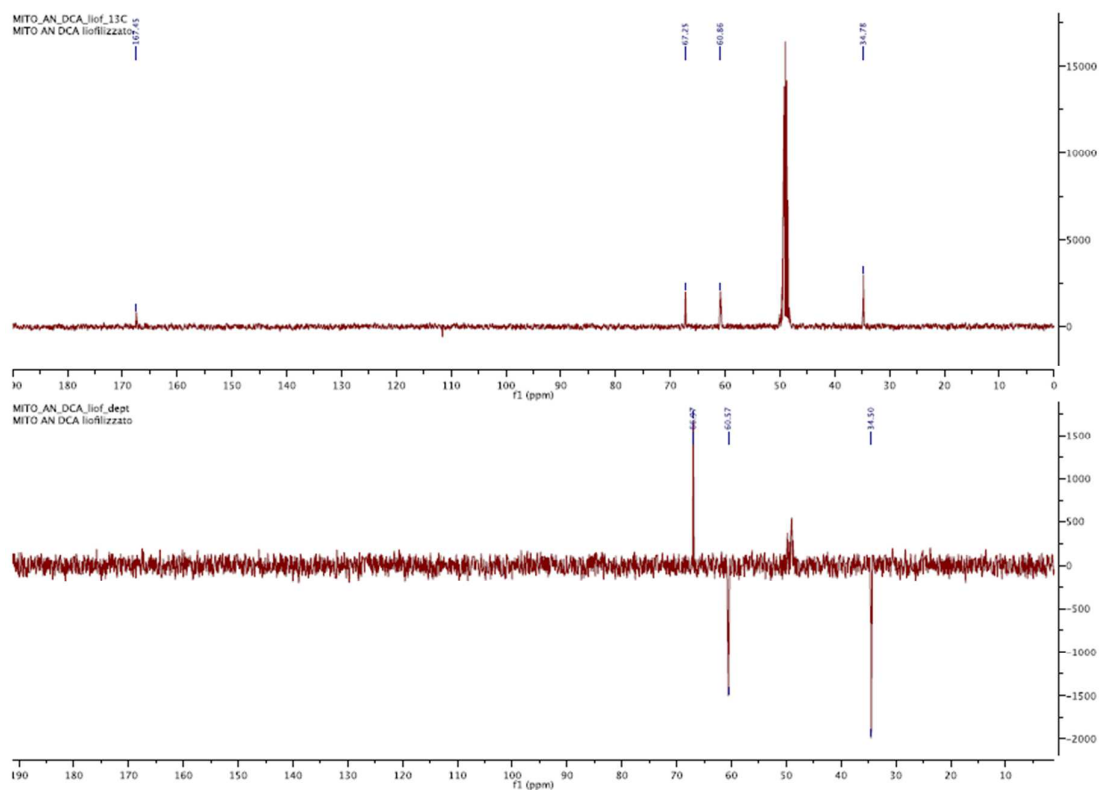

Purity grade by HPLC of compound **11**:

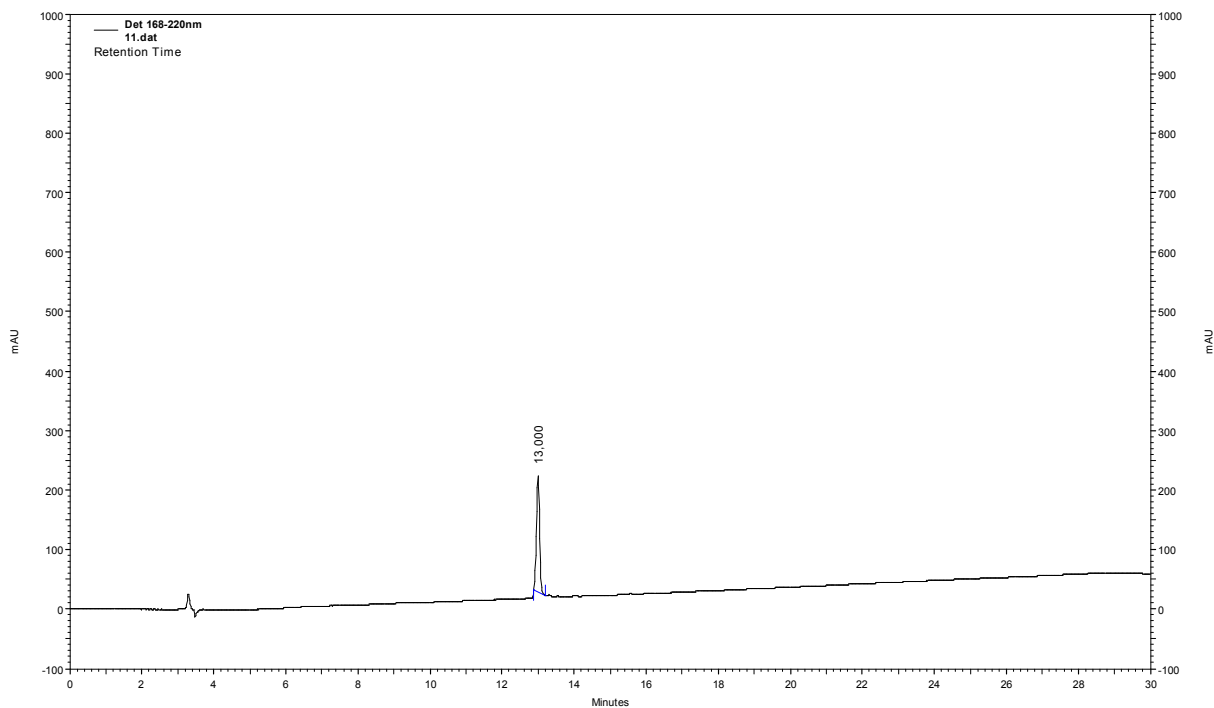

**Det 168-220nm****Results**

| Time   | Area    | Area % | Height | Height % |
|--------|---------|--------|--------|----------|
| 13,000 | 1209324 | 100,00 | 193908 | 100,00   |

|        |         |        |        |        |
|--------|---------|--------|--------|--------|
| Totals | 1209324 | 100,00 | 193908 | 100,00 |
|--------|---------|--------|--------|--------|

## LC-MS spectra of mouse plasma at 2.5h

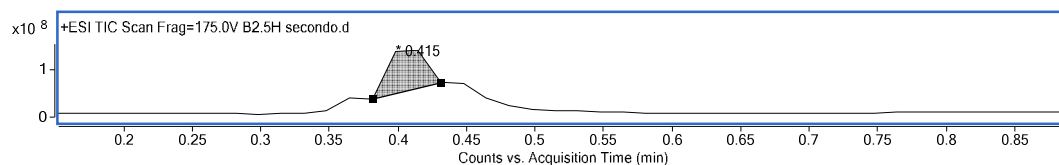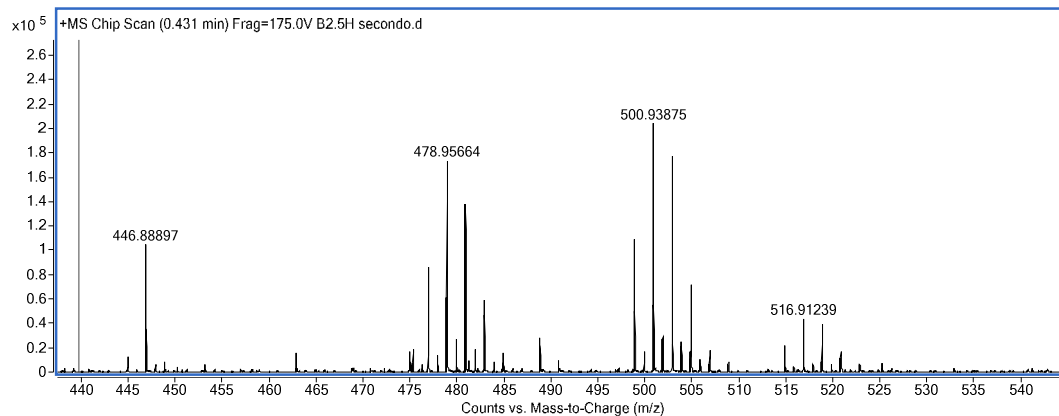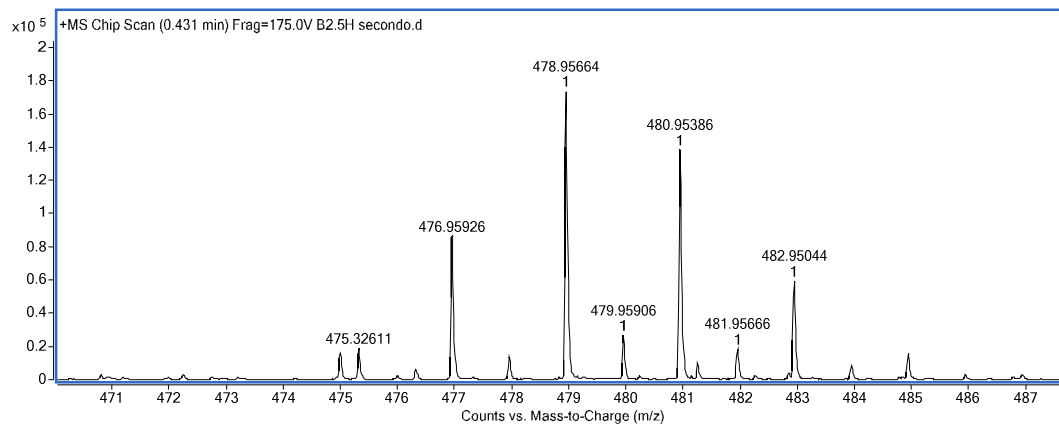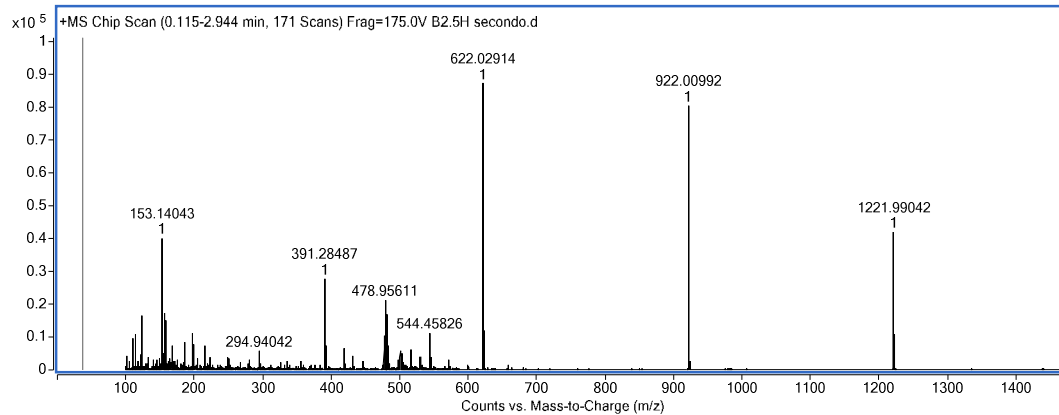

## LC-MS spectra of mouse plasma at 4h

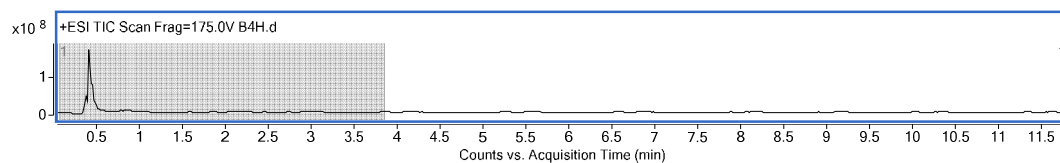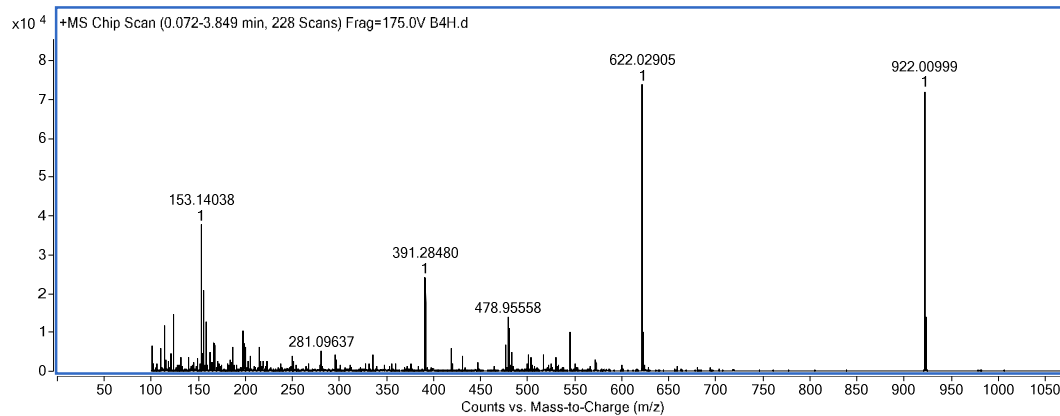

## LC-MS spectra of mouse plasma at 7h

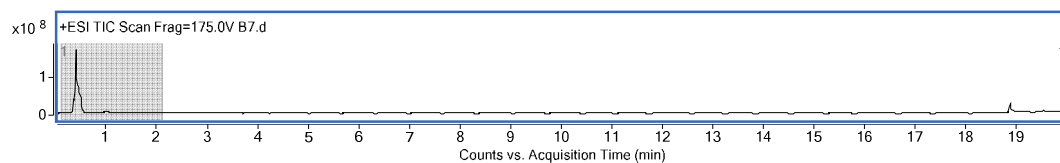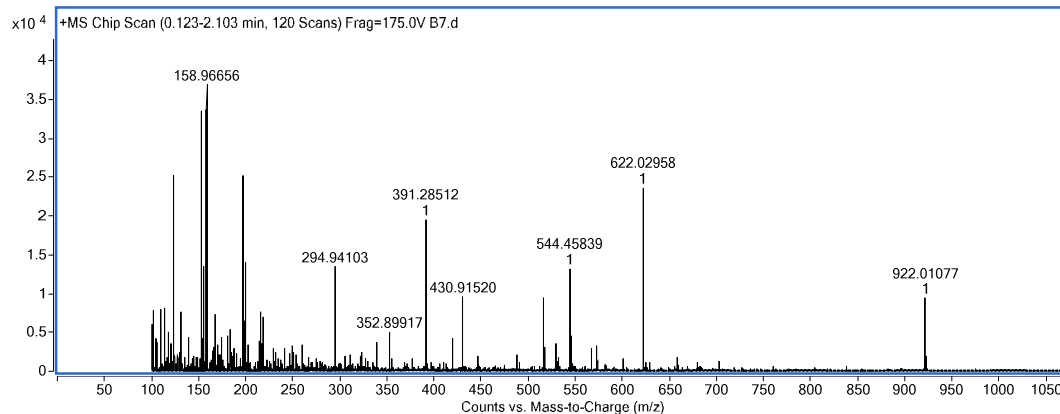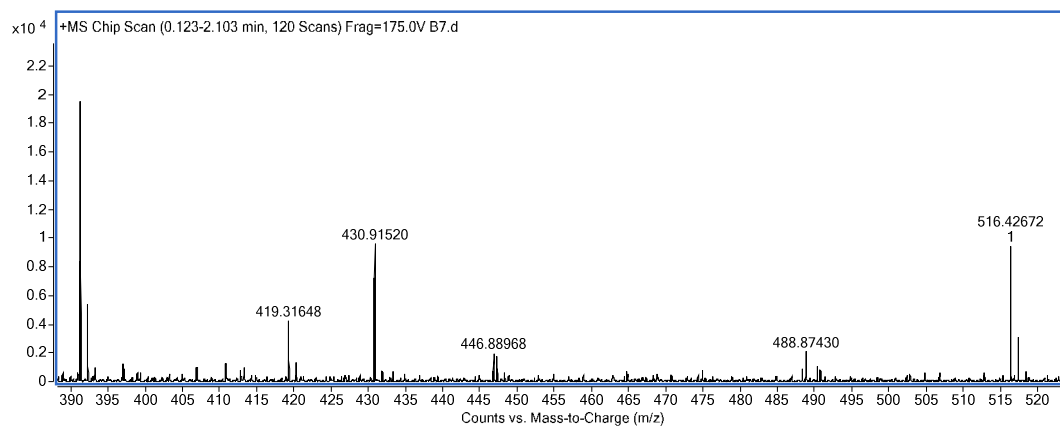

Supplement: Supplementary file 1 [file 3636105]
